## RESEARCH ARTICLE

# Antibiotic resistance of blood cultures in regional and tertiary hospital settings of Tyrol, Austria (2006-2015): Impacts & trends

Peter Kreidl<sup>1</sup>, Thomas Kirchner<sup>2</sup>, Manfred Fille<sup>1</sup>, Ingrid Heller<sup>1</sup>, Cornelia Lass-Flörl<sup>1</sup>, Dorothea Orth-Höller<sup>1\*</sup>

**1** Department of Hygiene, Microbiology and Public Health, Medical University of Innsbruck, Innsbruck, Austria, **2** Department of Orthopedics, Hospital St. Vincent, Zams, Austria

\* [dorothea.orth@i-med.ac.at](mailto:dorothea.orth@i-med.ac.at)

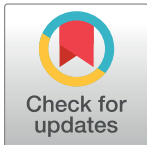

## Abstract

Blood stream infections rank among the top seven causes of death of the general population. The aim of our study was to better understand the epidemiology of BSI in order to improve diagnostics and patient outcome. We used retrospective aggregated laboratory data of blood samples received from all public hospitals in Tyrol, Austria between 2006 and 2015. Microorganisms were categorized into obligatory, facultative, unusual pathogens and contaminants. The distribution, the cumulative incidence and antimicrobial susceptibility patterns were compared between the tertiary (TH) and regional peripheral hospitals (PH). Among 256,364 blood samples, 76.1% were from the TH. The incidence of obligatory pathogens was 1.7 fold, and up to 3 times higher for facultative, unusual pathogens and contaminants in the TH and increased mainly due to an increase of *E. coli*, which was the most common isolated pathogen ( $n = 2,869$ ), followed by *Staphylococcus aureus* ( $n = 1,439$ ), *Enterococcus sp.* ( $n = 953$ ) and *Klebsiella sp.* ( $n = 816$ ). The distribution of obligatory pathogens differed between the hospital settings: In the TH *Enterococcus sp.* accounted for 40.8% and *E. coli* for 70.4%, respectively, whereas in the PH for 25.4% ( $p < 0.0001$ ) and 57.8%, respectively ( $p < 0.0001$ ). Antibiotic resistance of Gram negative bacteria and *Staphylococcus aureus* did not change during the observation period. Carbapenem resistance of *Klebsiella sp.* and vancomycin and linezolid resistance of *Enterococcus faecium* showed a non-significant increase since 2010 in the TH setting. We concluded that the incidence of BSI in TH was higher compared to PH. We observed higher contamination rates in the TH. We could not interpret the data of coagulase negative staphylococci due to lack of clinical data. We strongly recommend enhancement of training on blood culture sampling to decrease the rate of contamination. Due to differences in pathogen distribution and antimicrobial resistance between different hospital settings we recommend separate treatment guidelines for BSI by hospital setting.

## OPEN ACCESS

**Citation:** Kreidl P, Kirchner T, Fille M, Heller I, Lass-Flörl C, Orth-Höller D (2019) Antibiotic resistance of blood cultures in regional and tertiary hospital settings of Tyrol, Austria (2006-2015): Impacts & trends. PLoS ONE 14(10): e0223467. <https://doi.org/10.1371/journal.pone.0223467>

**Editor:** Peter Gyarmati, University of Illinois College of Medicine, UNITED STATES

**Received:** January 11, 2019

**Accepted:** September 18, 2019

**Published:** October 10, 2019

**Copyright:** © 2019 Kreidl et al. This is an open access article distributed under the terms of the [Creative Commons Attribution License](https://creativecommons.org/licenses/by/4.0/), which permits unrestricted use, distribution, and reproduction in any medium, provided the original author and source are credited.

**Data Availability Statement:** All relevant data are within the manuscript and its Supporting Information files.

**Funding:** The author(s) received no specific funding for this work.

**Competing interests:** The authors have declared that no competing interests exist.

## Introduction

Blood stream infections (BSI) are estimated to rank among the top seven causes of death of the general population, with more than 1.2 million reported episodes and 157,000 deaths per year in Europe [1]. Advances in medicine have led to an increased number of immune-compromised hosts, and invasive devices in the outpatient setting are more frequently used, thus influencing the epidemiology of BSI [2–5]. The emergence of multidrug-resistant pathogens and the lack of development of new antimicrobial agents to combat such infections contribute to this emerging public health problem [6, 7]. Geographical divergence of antimicrobial resistance is well known. In Austria multidrug-resistant bacteria under EU/EEA surveillance consistently remain below the European weighted means [4].

For a successful treatment of sepsis patients, a timely and accurate diagnosis is mandatory and blood culture is still the gold standard in laboratory diagnosis [8]. At least two pairs of aerobic and anaerobic bottles with a sufficient amount of blood (10 ml) obtained through venipuncture are recommended. Samples should be forwarded to the laboratory as soon as possible and incubated for at least 5 days [5]. Interpretation of positive blood cultures should be evaluated in context of the clinical picture. Commensals, such as *Corynebacterium sp.* and *Propionibacterium sp.* usually represent contamination, whereas the detection of viridans group streptococci and coagulase-negative staphylococci is more difficult to interpret. Estimates that the latter mentioned bacteria represent true BSI range between 15% to 78% [5]. In contrast, other identified bacteria such as Enterobacteriaceae or non-fermentative Gram-negative bacteria usually represent true BSI.

The aim of this work was to better understand the epidemiology of BSI in order to improve diagnostics and patient outcome. Objectives were to identify differences in the distribution of pathogens and cumulative incidence between the tertiary and peripheral hospitals and to describe epidemiological trends including changes in susceptibility patterns of the most relevant pathogens over a 10 year period.

## Methods

### Design, setting, participants and samples; interventions; definitions and denominators

We used aggregated retrospective data of all identified positive blood cultures between 2006 and 2015 to describe the distribution of pathogens and their susceptibility patterns by hospital setting with a focus on bacterial pathogens.

During the observation period the laboratory software EKM Bactlab [9] was used for administrative purposes in the Laboratory of the Division of Hygiene and Medical Microbiology (HMM) and the software HyBASE<sup>®</sup> Labor (epiNET AG) for data extraction. Aggregated data were exported to Microsoft Excel 2010 and further analyzed.

Tyrol, one of Austria's nine provinces (739,139 inhabitants in 2016) comprises one tertiary hospital (TH) with an annual mean of 1,536.9 hospital beds and an annual mean of 497,955.4 admitted patients, and nine peripheral hospitals (PH) with an annual mean of 2,201.7 beds and an annual mean of 895,958.7 admitted patients during the ten year observation period [10]. Microbiological samples from all hospitals were exclusively sent to the HMM which received between 60 and 80 blood culture sets per day for diagnostic purposes. The TH had an all-in contract with the HMM consisting of a pre-arrangement for the remuneration of all laboratory samples. In contrast, the PH had to pay for each individual sample.

Participants were patients from whom blood cultures were obtained during their hospital stay in one of the Tyrolean hospitals during the ten year observation period. Blood cultures

were reported having been obtained only when BSI was suspected according to existing guidelines [8].

All blood cultures from the TH and the PH were included in the description of sampling strategies.

For further analysis consecutive positive samples of patients with the same isolated microorganism were excluded.

The study design was a retrospective cohort design, therefore no interventions were planned.

Blood culture diagnostics comprise aerobic and anaerobic samples. We counted each blood culture bottle as single sample (BC) irrespective of the corresponding patients. This denominator was used to assess the sampling strategies in the two different hospital settings.

Patient samples were defined as the first BC (either aerobic or anaerobic bottles) of each individual patient irrespective of the identification of microorganisms.

Three experienced microbiologists categorized the identified microorganisms into five groups:

- **Group 1: Obligatory pathogens (OP):** always classified as causative agent of blood stream infection (BSI) if identified in blood cultures (e.g. *Staphylococcus aureus*, Enterobacteriaceae such as *Escherichia coli*, *Streptococcus pneumoniae*, *Neisseria meningitidis*)
- **Group 2: Facultative pathogens (FP) excluding coagulase negative staphylococci:** contamination or transient bacteremia cannot be excluded (e.g. alpha hemolytic streptococci)
- **Group 3: Facultative pathogens (FP-CNS)—coagulase negative staphylococci:** contamination or transient bacteremia cannot be excluded
- **Group 4: Unusual pathogens:** rarely detected in humans, rarely described in case reports causing bacteremia (e.g. *Actinomyces sp.*, *Lactobacillus sp.*, *Moraxella sp.*, *Ruminococcus gnavus*), clinical information is essential for interpretation of laboratory results
- **Group 5: Contamination:** very high likelihood of not being responsible for infection (e.g. *Bacillus sp.*, *Propionibacterium sp.*)

The cumulative incidence was defined as the cumulative number of positive PS per hospital category divided by number of hospital beds per hospital category.

## Laboratory investigation

The HMM is certified by ISO 9001/2015. Two to three pairs of BC from different sites were recommended to be drawn by venipuncture. More than 90% of samples were forwarded to the HMM the same day. Courier services including transport by ambulances were in place to ensure rapid delivery of samples. The range of delay in samples arriving from the hospitals in the laboratory was considered between 30 minutes and 6 hours, in general. Upon arrival, samples were immediately processed in the BacT/ALERT<sup>®</sup> 3D microbial detection system (Bio-Merieux, Marcy-Etoile, France) for all but two peripheral hospitals and BACTEC (Becton Dickinson, Heidelberg, Germany) for the latter. Samples were incubated for five days in exceptional circumstances up to seven days (e.g. HIV patients and suspected endocarditis). As soon as there was an alert of positivity, a Gram-staining and sub-cultivation on agar plates were performed according to the standard techniques [11]. Preliminary positive samples were cultivated on Columbia blood-, chocolate-, MacConkey- and Schaedler anaerobic agar (all Becton Dickinson, Heidelberg, Germany) and incubated for 24 hours at 37°C under aerobic and 48 hours under anaerobic conditions. Identification of pathogens was performed with MALDI<sup>®</sup>

Biotyper system (Bruker Daltonics, Bremen, Germany) using the direct smear method from agar plates since April 2011. Scores above 1.7 were considered valid. In case MALDI-TOF did not deliver appropriate results 16s rRNA gene sequencing was performed. MALDI-TOF MS was exclusively performed from isolates of positive blood cultures. Prior to 2011 biochemical identification using standard microbiological procedures such as API- or VITEK-system (Bio-merieux) was conducted.

Antibiotic susceptibility testing was performed according to the European Committee on Antimicrobial Susceptibility Testing (EUCAST) protocol [12] since 2013 and prior according to the CLSI guidelines using disc diffusion testing and the VITEK-system [13, 14].

Positive results of blood cultures of Gram-negative bacteria and yeasts were routinely reported to the sending institution by telephone as soon as a pathogen had been identified by microscopy and the susceptibility results as soon as they were available. All microbiological results were sent to the respective sending institution. The working hours of the laboratory were from 7 a.m. until 7 p.m. including half days on weekends and public holidays.

Data on age, sex, diagnosis, antimicrobial treatment and outcome were not available at HMM. Therefore no infection related outcome could be determined. For retrospective observational studies no ethics committee approval is required by Austrian law.

### Potential threats to internal validity; sample size; statistical methods

All blood culture results were evaluated by a well-trained team of medical microbiologists following the standard operational procedures and 256,364 blood culture samples were investigated.

Potential threats to internal validity were misspelling of names resulting in potential double counting of patients.

Aggregated data were stored and further analysed in excel. The 2-sample z-test was used to compare sample proportions and the Pearson Chi-square test to calculate the trend, using the “EpiTools epidemiological calculators” (Sergeant, ESG, 2018. EpiTools epidemiological calculators. Ausvet Pty Ltd. Available at: <http://epitools.ausvet.com.au>). A p-value of less than 0.05 was considered statistically significant. Risk ratios including 95% confidence intervals were calculated using MedCalc epidemiological calculator (Ostend, Belgium, 2018. Available at: [https://www.medcalc.org/calc/relative\\_risk.php](https://www.medcalc.org/calc/relative_risk.php)).

### Ethical statement

All patient samples were stored in an electronic laboratory software in the Laboratory Division of Hygiene and Microbiology. Only anonymous aggregated data were used for analysis. The ethics committee explicitly states that for retrospective data analysis no ethical approval is required.

### Results

Between 2006 and 2015, we investigated 256,364 BC from Tyrolean hospitals (median 25,285 per year (annual range: 24,160–27,929) (Fig 1).

More than  $\frac{3}{4}$  of samples were sent by the TH. Samples sent from the TH decreased by 19.7% and samples from the PH increased by 44.1% during the observation period.

The mean number of BC per patient was 4.7 (annual range: 4.2–5.4) and higher in the TH (mean 5.6; annual range: 5.1–6.5) compared to PH (mean 3.0; annual range: 2.7–3.3) ( $p < 0.0001$ ). In PH, the median number of BC was increasing from 2.7 to 3.2 per patient, and in contrast, decreasing from 6.1 to 5.4 in the TH.

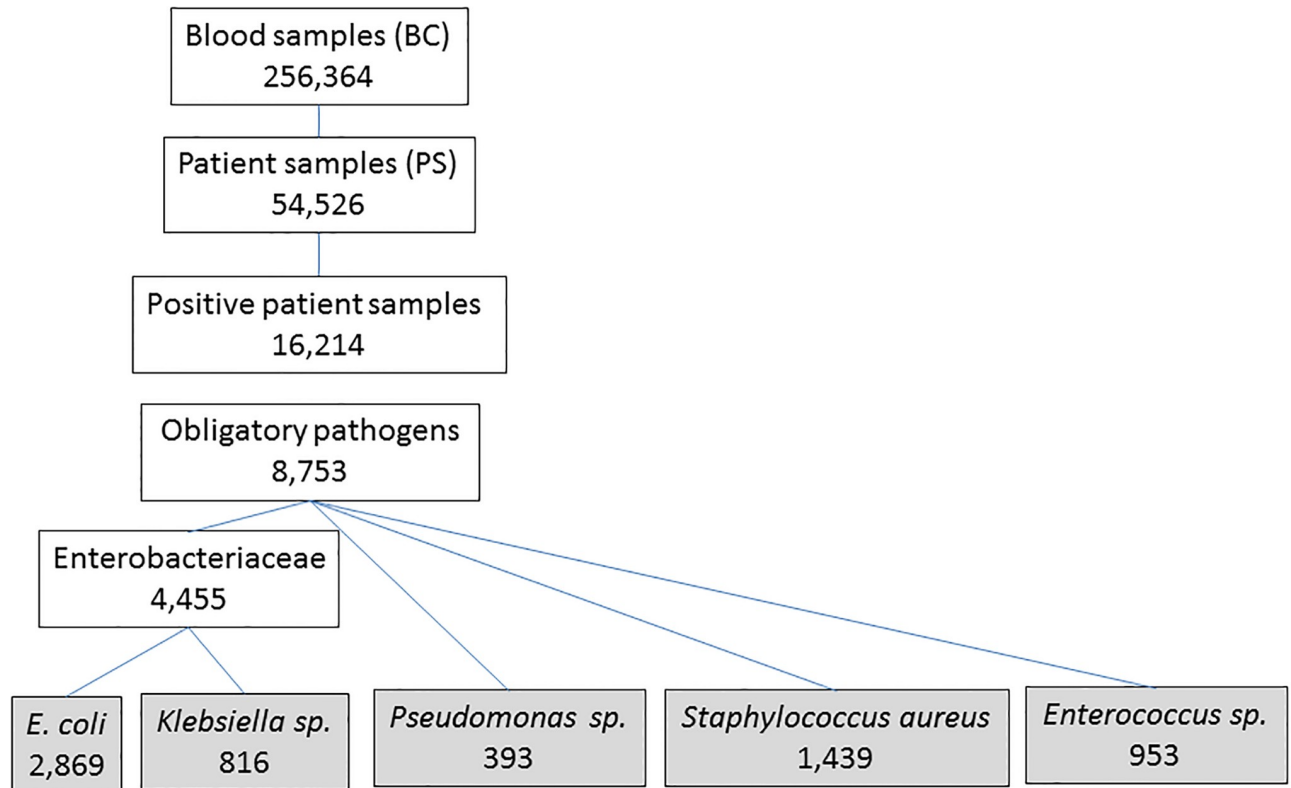

**Fig 1. Number of samples and pathogens.**

<https://doi.org/10.1371/journal.pone.0223467.g001>

Among 54,526 patient samples (PS), we identified microorganisms in 29.7% ( $n = 16,214$ ). This proportion was higher in PH (34.4%,  $n = 9,292$ ) compared to the TH (27.0%,  $n = 6,922$ ) ( $p < 0.0001$ ).

The proportion of PS positive with obligatory pathogens among all PS was also higher in the PH (21.4%) compared to the TH (12.9%;  $p < 0.001$ ).

The cumulative incidence of positive samples per patient was two times higher in the TH (11.2 per 1,000 admitted patients) compared to 5.1, in the PH setting and slightly less for obligatory pathogens (5.3 per 1000 admitted patients for TH and 3.2 for PH). Between 2006 and 2015, the annual incidence of obligatory pathogens increased from 4.3 per 1,000 admitted patients to 7.3 in the TH, and from 1.9 to 5.1 in PH, respectively ( $p < 0.001$ ). The risk ratio for a positive result with an obligatory pathogen in a BC was 1.7 times higher in the TH compared to PH. The risk ratios for all other microorganism categories were nearly three times higher in the TH (Table 1).

### Positive patient samples

More than half of the 16,214 identified microorganisms (54.0%;  $n = 8,753$ ) were classified as obligatory, 41.7% as facultative ( $n = 6,756$ ), 1.1% ( $n = 178$ ) as unusual pathogens and 3.7% ( $n = 527$ ) as contamination. Eighty six percent of facultative pathogens were due to coagulase negative staphylococci ( $n = 5,838$ ).

### Obligatory pathogens

Among obligatory pathogens, more than half (58.9%) were Gram-negative bacteria ( $n = 5,157$ ) of which 99.4% were rods ( $n = 5,127$ ). Gram-positive bacteria accounted for

**Table 1. Microorganisms, cumulative incidence/1,000 admitted patients and risk ratio (95% confidence interval) by hospital setting.**

| Microorganism category                                           | N cases TH | % cases TH | Cumulative incidence TH per 1,000 admitted patients | N cases PH | % cases PH | Cumulative incidence PH per 1,000 admitted patients | RR (TH versus PH) | 95% CI    |
|------------------------------------------------------------------|------------|------------|-----------------------------------------------------|------------|------------|-----------------------------------------------------|-------------------|-----------|
| Obligatory pathogens                                             | 4,443      | 47.8%      | 5.3                                                 | 4,310      | 62.3%      | 3.2                                                 | 1.68              | 1.61–1.75 |
| Facultative pathogens (without coagulase negative staphylococci) | 581        | 6.3%       | 1.2                                                 | 337        | 4.9%       | 0.4                                                 | 2.81              | 2.46–3.21 |
| Coagulase negative staphylococci                                 | 3,808      | 41.0%      | 7.6                                                 | 2,030      | 29.3%      | 2.3                                                 | 3.06              | 2.90–3.23 |
| Unusual pathogens                                                | 120        | 1.3%       | 0.2                                                 | 58         | 0.8%       | 0.1                                                 | 3.37              | 2.47–4.61 |
| Contamination                                                    | 340        | 3.7%       | 0.7                                                 | 187        | 2.7%       | 0.2                                                 | 2.96              | 2.48–3.54 |
| Total                                                            | 9,292      | 100%       | 18.7                                                | 6,922      | 100%       | 7.7                                                 | na                | na        |

na = not applicable; TH = tertiary hospital; PH = peripheral hospitals; CI = confidence interval

<https://doi.org/10.1371/journal.pone.0223467.t001>

33.7% of obligatory pathogens (n = 2,945) of which 97.3% were cocci (n = 2,866). Seven point four percent were fungi (n = 650) of which 99.5% were *Candida sp.* The proportion of fungi was significantly higher in the TH (9.5%; n = 421) compared to PH (5.3%; n = 229) (p<0.0001).

Enterobacteriaceae were the most commonly isolated obligatory pathogens and accounted for 1/3 of obligatory pathogens. *E.coli* was the most frequently isolated species followed by *Staphylococcus aureus*, *Enterococcus sp.* and *Klebsiella sp.* in both hospital settings. *E.coli*, *Staphylococcus aureus*, *Streptococcus pneumoniae* and beta-hemolytic streptococci were more common in PH, *Enterococcus sp.*, *Klebsiella sp.*, *Candida sp.*, *Pseudomonas sp.* and *Enterobacter sp.* more common in the TH. This distribution of obligatory pathogens remained similar during the observation period. The proportion of *E. coli* in the PH increased from 30.9% in 2006 to 41.4% in 2015 (Table 2).

### Antibiotic susceptibility testing of the most common obligatory pathogens

The risk ratio of pathogens resistant to commonly used antibiotics was higher in the TH for *E. coli*, *Klebsiella sp.*, *Enterococcus faecium* and *Pseudomonas sp.* Antibiotic resistance of *E.coli* and *Klebsiella sp.* to carbapenem was not significantly different between the two hospital settings, and so was ceftazidime resistance (as marker for methicillin resistance) among *Staphylococcus aureus* isolates (Table 3).

The trend of *E.coli* resistance to aminopenicillin and 3<sup>rd</sup> generation cephalosporin (ceftriaxone) was decreasing during the observation period and undulating for the other tested antibiotics. Between 2014 and 2015, an increase was observed for all tested antibiotic classes (Fig 2).

Resistance of *Klebsiella sp.* to tested antibiotics did not change during the observation period except for carbapenem resistance, which showed an increasing trend since 2010/11 in both hospital settings (Fig 3).

The proportion of methicillin resistant *Staphylococcus aureus* (MRSA) (tested for ceftazidime) did not increase over time in neither hospital setting.

Vancomycin and linezolid resistance of *Enterococcus faecium* increased since 2010 in the TH (Fig 4).

The resistance of *Pseudomonas sp.* to all tested antibiotics remained similar during the observation period.

**Table 2. Number, most commonly isolated pathogens, cumulative incidence/ 1,000 admitted patients by hospital setting.**

| Pathogen                            | Total N first patient isolates TH | Cumulative incidence TH per 1,000 admitted patients | % of pathogens TH | Total N first patient isolates PH | Cumulative incidence PH per 1,000 admitted patients | % pathogens PH | P-value difference of % between hospital settings |
|-------------------------------------|-----------------------------------|-----------------------------------------------------|-------------------|-----------------------------------|-----------------------------------------------------|----------------|---------------------------------------------------|
| <i>E. coli</i>                      | 1,225                             | 1,5                                                 | 27,6%             | 1,644                             | 1,2                                                 | 38,1%          | <0.0001                                           |
| <i>Staphylococcus aureus</i>        | 692                               | 0,8                                                 | 15,6%             | 747                               | 0,6                                                 | 17,3%          | 0.0319                                            |
| <i>Enterococcus sp.</i>             | 596                               | 0,7                                                 | 13,4%             | 357                               | 0,3                                                 | 8,3%           | <0.0001                                           |
| <i>Klebsiella sp.</i>               | 469                               | 0,6                                                 | 10,6%             | 347                               | 0,3                                                 | 8,1%           | <0.0001                                           |
| other Gram neg bacteria             | 379                               | 0,5                                                 | 8,5%              | 339                               | 0,2                                                 | 7,9%           | 0.770                                             |
| <i>Candida sp.</i>                  | 421                               | 0,5                                                 | 9,5%              | 229                               | 0,2                                                 | 5,3%           | <0.0001                                           |
| <i>Pseudomonas sp.</i>              | 242                               | 0,3                                                 | 5,4%              | 151                               | 0,1                                                 | 3,5%           | <0.0001                                           |
| <i>Enterobacter sp.</i>             | 223                               | 0,3                                                 | 5,0%              | 144                               | 0,1                                                 | 3,3%           | <0.0001                                           |
| <i>Streptococcus pneumoniae</i>     | 78                                | 0,1                                                 | 1,8%              | 151                               | 0,1                                                 | 3,5%           | <0.0001                                           |
| <i>Streptococcus non pneumoniae</i> | 82                                | 0,1                                                 | 1,8%              | 133                               | 0,1                                                 | 3,1%           | <0.0001                                           |
| Other Gram pos bacteria             | 36                                | 0,0                                                 | 0,8%              | 68                                | 0,1                                                 | 1,6%           | 0.735                                             |
| TOTAL                               | 4,443                             | 5,3                                                 | 100,0%            | 4,310                             | 3,2                                                 | 100%           |                                                   |

TH = tertiary hospital; PH = peripheral hospitals

<https://doi.org/10.1371/journal.pone.0223467.t002>

**Table 3. Proportion of resistant strains, cumulative incidence risk ratio (RR) (95% confidence interval).**

| Pathogen                     | Antibiotics tested      | % resistant TH | % resistant PH | RR (TH versus PH) | 95% CI     |
|------------------------------|-------------------------|----------------|----------------|-------------------|------------|
| <i>E. coli</i>               | Aminopenicillin         | 71.8%          | 61.4%          | 1.17              | 1.11–1.23  |
|                              | Ciprofloxacin           | 37.5%          | 22.7%          | 1.65              | 1.47–1.85  |
|                              | Ceftriaxone             | 21.3%          | 13.6%          | 1.56              | 1.33–1.84  |
|                              | Gentamicin              | 12.1%          | 6.8%           | 1.78              | 1.40–2.24  |
|                              | Carbapenem              | 0.3%           | 0.4%           | 0.77              | 0.23–2.62  |
| <i>Klebsiella sp.</i>        | Ciprofloxacin           | 26.0%          | 17.1%          | 1.53              | 1.11–2.11  |
|                              | Ceftriaxone             | 21.0%          | 12.8%          | 1.64              | 1.13–2.38  |
|                              | Gentamicin              | 10.5%          | 6.3%           | 3.68              | 2.22–6.10  |
|                              | Carbapenem              | 3.5%           | 1.6%           | 2.26              | 0.74–6.84  |
| <i>Enterococcus faecium</i>  | Vancomycin              | 10.1%          | 2.6%           | 3.91              | 1.21–12.60 |
|                              | Linezolid               | 5.0%           | 0.9%           | 6.12              | 0.82–46.01 |
| <i>Enterococcus faecalis</i> | Vancomycin              | 2.3%           | 0.5%           | 5.07              | 0.63–40.91 |
| <i>Staphylococcus aureus</i> | Cefoxitin*              | 8.5%           | 6.8%           | 1.25              | 0.87–1.79  |
| <i>Pseudomonas sp.</i>       | Ciprofloxacin           | 38.1%          | 15.1%          | 2.53              | 1.66–3.84  |
|                              | Ceftazidime             | 26.7%          | 14.2%          | 1.88              | 1.97–2.96  |
|                              | Gentamicin              | 26.1%          | 5.4%           | 4.80              | 2.36–9.74  |
|                              | Carbapenem              | 38.9%          | 12.8%          | 3.03              | 1.93–4.75  |
|                              | Piperacillin/tazobactam | 19.9%          | 6.8%           | 2.93              | 1.52–5.64  |

TH = tertiary hospital; PH = peripheral hospitals;

\* Cefoxitin as marker for oxacillin/methicillin resistance

<https://doi.org/10.1371/journal.pone.0223467.t003>

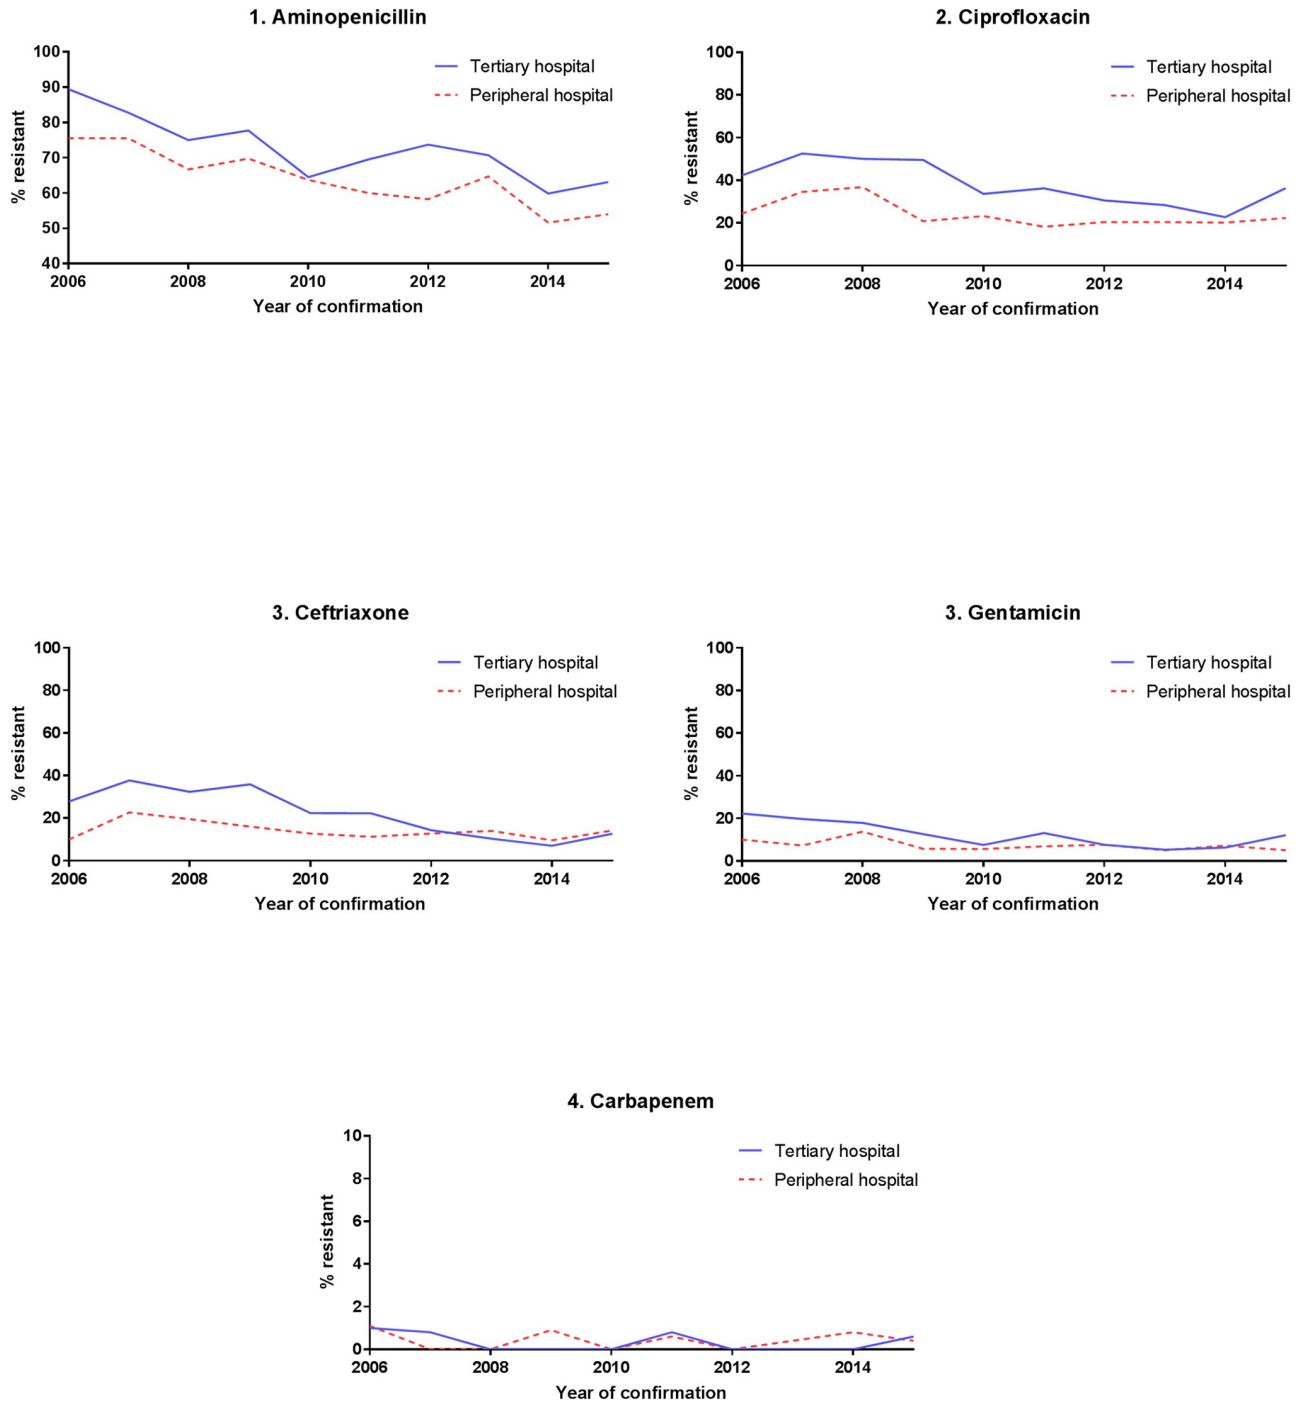

Fig 2. Proportion of antibiotic resistant of E.coli strains over time by hospital setting.

<https://doi.org/10.1371/journal.pone.0223467.g002>

### Discussion

In our 10 year observational study of blood cultures from all public hospitals in Tyrol, Austria, we found significant differences in the proportion of positive samples, the distribution of pathogens and their resistance patterns between peripheral and the tertiary hospitals. The proportion of positive patient samples and obligatory pathogens was higher in the PH compared to



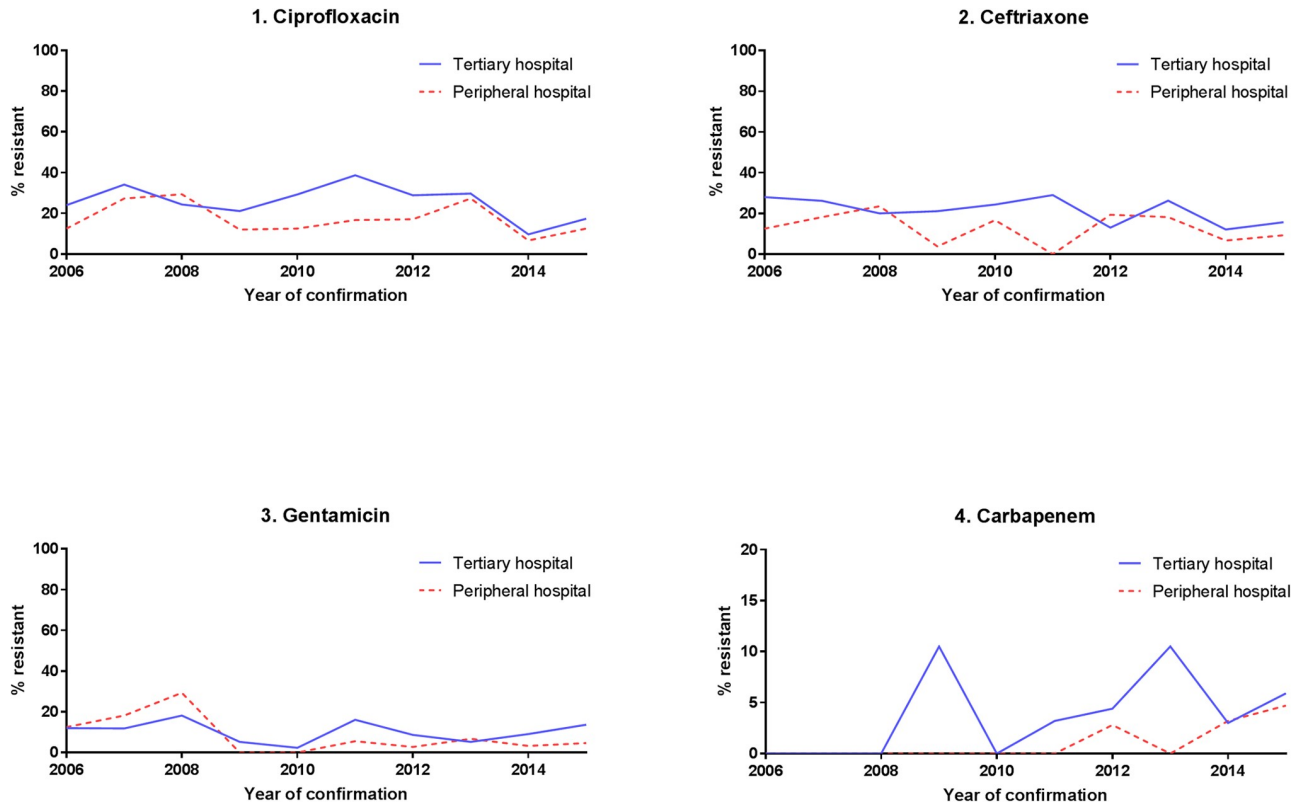

Fig 3. Proportion of antibiotic resistant *Klebsiella sp.* strains over time by hospital setting.

<https://doi.org/10.1371/journal.pone.0223467.g003>

the TH. In addition, the cumulative incidence of positive PS and also that of obligatory pathogens was twice as high in the TH compared to PH, and of facultative-, unusual pathogens and contaminations in the TH even three times higher. This can be attributed to different patient populations between the two hospitals and may also partly be due to a less frequent sampling in the peripheral hospital setting.

Although the TH comprised only 36% of admitted patients compared to the nine PH, ¾ of samples were sent from the TH. In addition, also the mean number of blood culture samples sent per patient was nearly twice as many in the TH compared to the PH. This was partly due to different contracts between the two hospital settings: an all-in contract with the TH and individual payment of each sample from the PH.

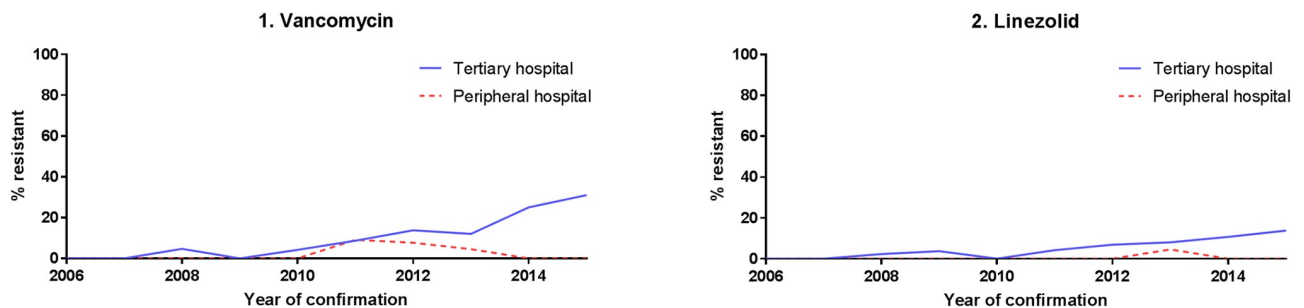

Fig 4. Proportion of antibiotic resistant of *Enterococcus faecium* strains over time by hospital category.

<https://doi.org/10.1371/journal.pone.0223467.g004>

In general, health care workers obtaining blood cultures need to be well trained and blood culture collection protocols should be repeatedly emphasized. Feghaly et al. describe lower contamination rates by enhancing training and standardizing protocols [15]. Kirn et al. conclude that increasing the number of samples without enhancing the quality of blood culture collection will result in higher contamination rates, unnecessary antibiotic treatment, longer hospital stays and higher costs [5]. Current guidelines suggest that six bottles (3 pairs of each 10 mL) of blood cultures taken by venipuncture within 24 hours are needed to reach a sensitivity of 95–99% in detecting bacteremia [8] only from patients presenting with clinical findings compatible with blood stream infections due to low circulating viable pathogens [5, 16]. Lack of adequate training on blood sampling techniques may also have contributed to the high contamination rates, especially in the tertiary hospital setting.

Rodriguez-Bano et al. found that 58% of BSI were hospital-acquired infections, 24% were healthcare associated and 18% were community acquired in two similar hospital settings [17]. As our data did not allow a distinction between the above mentioned categories we can only assume that the distribution between community-, healthcare-associated and hospital-acquired infection might be similar. Even though our data did not allow stratification between these categories, we found a significant difference in the number of BSI episodes between TH and PH hospital settings. More severe conditions of patients, a higher proportion of immunocompromised patients and probably a more frequent use of broad spectrum antibiotics were likely to have increased the risk of infection and antimicrobial resistance in the TH.

The detailed analysis of obligatory pathogens revealed *E. coli* as most frequently isolated pathogen, accounting for approximately one third of obligatory pathogens, followed by *Staphylococcus aureus* which was isolated approximately half as frequently compared to *E. coli*.

The likelihood of detection of certain pathogens varied significantly between the two hospital settings: while *E. coli*, *Staphylococcus aureus*, *Streptococcus pneumoniae* and *beta hemolytic streptococci* were observed more frequently in the PH, *Enterococcus sp.*, *Klebsiella sp.* and *Enterobacter sp.* were more frequently isolated from patients admitted to the TH. A similar distribution of obligatory pathogens—*E. coli* as most common isolated pathogen followed by *Staphylococcus aureus*—was described by several authors [18–21]. Comparisons with international data remain limited due to different inclusion criteria of pathogens.

*E. coli* showed an increasing trend mainly in the peripheral hospitals while *Staphylococcus aureus* remained stable in both hospital settings. An increasing trend of *E. coli* BSI was also described in France [22] and Finland [23] mainly among 3<sup>rd</sup> generation cephalosporin resistant strains. Van der Mee-Marquet et al. concluded, that the increase of community acquired BSI due to *E. coli* can be greatly attributed to an increase in persons > 74 years of age [22]. According to the authors, immune senescence, changes in mucosal and skin barriers, degenerative changes and comorbid conditions are contributing factors in elderly patients [22]. Unfortunately, age was not available for our data analysis.

Antibiotic resistance to all tested antibiotics was consistently higher in the TH, although due to small numbers not all results were statistically significant.

The decrease in antibiotic susceptibility of 3<sup>rd</sup> generation cephalosporins was probably partly caused by the switch from CLSI (Clinical and Laboratory Standards Institute) guidelines to EUCAST in February 2012 [24]. Prior to the recommendation of EUCAST extended spectrum beta-lactamase producing enterobacteriaceae were always classified as 3<sup>rd</sup> generation cephalosporin resistant. Since then, resistance to the above mentioned antibiotics has been reported according to the zone of inhibition [25].

We conclude that guidance for empirical antibiotic treatment of BSI should be tailored according to the hospital setting due to the different susceptibility patterns in the two hospital settings.

The emergence of vancomycin and linezolid resistant enterococci and carbapenem resistance in Gram-negative bacteria needs close monitoring and rigorous antimicrobial stewardship.

One main limitation of our study was that we were lacking detailed patient information. Therefore it was neither possible to distinguish nosocomial from community acquired infections nor to interpret the relevance of isolated coagulase negative staphylococci. In our available aggregated dataset, we classified all coagulase negative staphylococci as facultative pathogens. We could not apply any criteria with the available data, which would have allowed us to distinguish between infection and contamination and thus we decided not to further interpret CNS positivity. According to literature [5, 26] we have to assume that at least 15% of the positive samples with confirmed CNS were real BSI. Therefore, our classification of pathogens probably resulted in an underestimation of the true burden of BSI. In addition, we were not able to assess if there was any difference of BSI of CNS positive blood samples by hospital setting.

Nevertheless, the close collaboration and discussions with the tertiary hospital staff helped in individually interpreting the clinical importance of blood cultures found positive for CNS at the time of diagnosis.

Smith et. al. reported previous linezolid exposure and duration as main determinants for development of linezolid resistance in enterococci [27]. In the TH the linezolid usage was high ranging from 8,000 to 10,500 grams per. No further molecular analysis to establish the mechanism of linezolid resistance was conducted in our isolates.

Furthermore, we were not able to calculate the population based cumulative incidence as the catchment population of the TH consisted of patients both, from one district but also referrals from the PH.

Two peripheral hospitals, which accounted for less than 5% of admitted patients in the PH only sent positive blood cultures for species diagnosis and antibiotic susceptibility testing which resulted in an overestimation of the proportion of positive samples from PH. Nevertheless, this is unlikely to have influenced the calculated cumulative incidence, which was similar to published results [28].

Despite the important limitations of our study which hamper our analysis, we are confident that our observations are important also for other settings. Since 2017, we have implemented a new computerized laboratory surveillance which will allow case based analysis as more detailed patient information is available for analysis. The new system also allows cluster detection and thus timely response to potential outbreaks.

General practitioners and rehabilitation centers were not included in our study which may have biased our results.

The fact that we could not control for BSI with multiple pathogens resulted in an overestimation of proportion of positive blood cultures per patient compared to the literature (16.1% versus 10.9%) [29]. An analysis of BSI during 2017 revealed that in 7.1% of positive blood cultures more than one pathogen was identified.

In summary we conclude, that the cumulative Incidence of BSI in TH is higher compared to PH. In addition, we also observed higher contamination rates in the TH. Therefore, we strongly recommend enhancement of training on blood culture sampling to decrease the rate of contamination especially in settings where blood culture sampling is frequently conducted. Due to the significant differences in pathogen distribution and resistance patterns between the two hospital settings, we suggest an adaptation of the current recommendation of empiric treatment for BSI by hospital setting. Furthermore, the emergence of multiresistant pathogens, such as vancomycin and linezolid resistant *Enterococci* and carbapenem resistant *Klebsiella* needs special attention and rigorous antimicrobial stewardship.

## Supporting information

**S1 Table. Microorganisms, cumulative incidence/1,000 admitted patients and risk ratio (95% confidence interval) by hospital setting.**

(PDF)

**S2 Table. Number, most commonly isolated pathogens, cumulative incidence/ 1,000 admitted patients by hospital setting.**

(PDF)

**S3 Table. Proportion of resistant strains, cumulative incidence risk ratio (RR) (95% confidence interval).**

(PDF)

**S1 Appendix. Aggregated data.**

(XLSX)

## Acknowledgments

The authors want to thank the staff of the bacteriology laboratory for collaboration.

## Author Contributions

**Conceptualization:** Peter Kreidl, Dorothea Orth-Höller.

**Data curation:** Peter Kreidl, Thomas Kirchner.

**Formal analysis:** Peter Kreidl, Thomas Kirchner.

**Investigation:** Thomas Kirchner, Manfred Fille, Ingrid Heller.

**Methodology:** Peter Kreidl, Manfred Fille, Ingrid Heller.

**Software:** Thomas Kirchner.

**Supervision:** Dorothea Orth-Höller.

**Validation:** Peter Kreidl, Thomas Kirchner, Manfred Fille, Dorothea Orth-Höller.

**Writing – original draft:** Peter Kreidl.

**Writing – review & editing:** Thomas Kirchner, Manfred Fille, Ingrid Heller, Cornelia Lass-Flörl, Dorothea Orth-Höller.

## References

1. Goto M, Al-Hasan MN. Overall burden of bloodstream infection and nosocomial bloodstream infection in North America and Europe. *Clin Microbiol Infect.* 2013; 19(6):501–509. <https://doi.org/10.1111/1469-0691.12195> PMID: 23473333
2. Conway LJ, Liu J, Harris AD, Larson EL. Risk Factors for Bacteremia in Patients With Urinary Catheter-Associated Bacteriuria. *Am J Crit Care.* 2016; 26(1):43–52. <https://doi.org/10.4037/ajcc2017220> PMID: 27965229
3. Kagan E, Salgado CD, Banks AL, Marculescu CE, Cantey JR. Peripherally inserted central catheter-associated bloodstream infection: Risk factors and the role of antibiotic-impregnated catheters for prevention. *Am J Infect Control.* 2018.
4. ECDC. Surveillance of antimicrobial resistance in Europe, 2016 2017 [cited 2018 13 Mar]. <https://ecdc.europa.eu/en/publications-data/antimicrobial-resistance-surveillance-europe-2016>.
5. Kirn TJ, Weinstein MP. Update on blood cultures: how to obtain, process, report, and interpret. *Clin Microbiol Infect.* 2013; 19(6):513–520. <https://doi.org/10.1111/1469-0691.12180> PMID: 23490046

6. Hughes D, Karlen A. Discovery and preclinical development of new antibiotics. *Ups J Med Sci*. 2014; 119(2):162–169. <https://doi.org/10.3109/03009734.2014.896437> PMID: 24646082
7. Gastmeier P, Schroder C, Behnke M, Meyer E, Geffers C. Dramatic increase in vancomycin-resistant enterococci in Germany. *J Antimicrob Chemother*. 2014; 69(6):1660–1664. <https://doi.org/10.1093/jac/dku035> PMID: 24615816
8. Towns ML, Jarvis WR, Hsueh PR. Guidelines on blood cultures. *J Microbiol Immunol Infect*. 2010; 43(4):347–349. [https://doi.org/10.1016/S1684-1182\(10\)60054-0](https://doi.org/10.1016/S1684-1182(10)60054-0) PMID: 20688297
9. EKM. Mikrobiologie—BactLAB [cited 2018 13 Mar]. [http://www.ekm-software.de/index\\_3.htm](http://www.ekm-software.de/index_3.htm).
10. Krankenanstalten AdTLADu. Krankenanstalten in Tirol Statistische Daten 2016 2017 [cited 2018 06 Sep]. [https://www.tirol.gv.at/fileadmin/themen/gesundheit-vorsorge/krankenanstalten/downloads/Abteilung\\_Krankenanstalten/Bericht\\_Statistische\\_Daten\\_2016.pdf](https://www.tirol.gv.at/fileadmin/themen/gesundheit-vorsorge/krankenanstalten/downloads/Abteilung_Krankenanstalten/Bericht_Statistische_Daten_2016.pdf).
11. Belows A HW, Hermann K, Isenberg H, Shadony H. *Manual of Clinical Microbiology*. 5th ed. Washington DC: American Society for Microbiology; 1991.
12. Susceptibility ECoA. Breakpoint tables for interpretation of MICs and zone diameters 2017 [cited 2017 28 Sep]. [http://www.eucast.org/clinical\\_breakpoints/](http://www.eucast.org/clinical_breakpoints/).
13. Jorgensen JH, Ferraro MJ. Antimicrobial susceptibility testing: general principles and contemporary practices. *Clin Infect Dis*. 1998; 26(4):973–980. <https://doi.org/10.1086/513938> PMID: 9564485
14. Jorgensen JH, Ferraro MJ. Antimicrobial susceptibility testing: a review of general principles and contemporary practices. *Clin Infect Dis*. 2009; 49(11):1749–1755. <https://doi.org/10.1086/647952> PMID: 19857164
15. El Feghaly RE, Chatterjee J, Dowdy K, Stempak LM, Morgan S, Needham W, et al. A Quality Improvement Initiative: Reducing Blood Culture Contamination in a Children’s Hospital. *Pediatrics*. 2018; 142(4).
16. Lee A, Mirrett S, Reller LB, Weinstein MP. Detection of bloodstream infections in adults: how many blood cultures are needed? *J Clin Microbiol*. 2007; 45(11):3546–3548. <https://doi.org/10.1128/JCM.01555-07> PMID: 17881544
17. Rodriguez-Bano J, Lopez-Prieto MD, Portillo MM, Retamar P, Natera C, Nuno E, et al. Epidemiology and clinical features of community-acquired, healthcare-associated and nosocomial bloodstream infections in tertiary-care and community hospitals. *Clin Microbiol Infect*. 2010; 16(9):1408–1413. <https://doi.org/10.1111/j.1469-0691.2009.03089.x> PMID: 19845694
18. Buetti N, Atkinson A, Kottanattu L, Bielicki J, Marschall J, Kronenberg A. Patterns and trends of pediatric bloodstream infections: a 7-year surveillance study. *Eur J Clin Microbiol Infect Dis*. 2017; 36(3):537–544. <https://doi.org/10.1007/s10096-016-2830-6> PMID: 27885442
19. Holmbom M, Giske CG, Fredrikson M, Ostholm Balkhed A, Claesson C, Nilsson LE, et al. 14-Year Survey in a Swedish County Reveals a Pronounced Increase in Bloodstream Infections (BSI). Comorbidity—An Independent Risk Factor for Both BSI and Mortality. *PLoS One*. 2016; 11(11):e0166527. <https://doi.org/10.1371/journal.pone.0166527> PMID: 27835663
20. Laupland KB, Church DL. Population-based epidemiology and microbiology of community-onset bloodstream infections. *Clin Microbiol Rev*. 2014; 27(4):647–664. <https://doi.org/10.1128/CMR.00002-14> PMID: 25278570
21. Luzzaro F, Viganò EF, Fossati D, Grossi A, Sala A, Sturla C, et al. Prevalence and drug susceptibility of pathogens causing bloodstream infections in northern Italy: a two-year study in 16 hospitals. *Eur J Clin Microbiol Infect Dis*. 2002; 21(12):849–855. <https://doi.org/10.1007/s10096-002-0837-7> PMID: 12525919
22. van der Mee-Marquet NL, Blanc DS, Gbaguidi-Haore H, Dos Santos Borges S, Viboud Q, Bertrand X, et al. Marked increase in incidence for bloodstream infections due to *Escherichia coli*, a side effect of previous antibiotic therapy in the elderly. *Front Microbiol*. 2015; 6:646. <https://doi.org/10.3389/fmicb.2015.00646> PMID: 26175721
23. Martelius T, Jalava J, Karki T, Mottonen T, Ollgren J, Lyytikäinen O. Nosocomial bloodstream infections caused by *Escherichia coli* and *Klebsiella pneumoniae* resistant to third-generation cephalosporins, Finland, 1999–2013: Trends, patient characteristics and mortality. *Infect Dis (Lond)*. 2016; 48(3):229–234.
24. Fille M BM, Hausdorfer J, Heller I, Orth D, Risslegger B, Weiss G et al. C. RESISTENZBERICHT 2012, Resistenzverhalten von Bakterien und Pilzen gegenüber Antibiotika und Antimykotika 2012 [cited 2017 10 Apr]. <https://www.i-med.ac.at/hygiene/dokumente/resistenzbericht-2012-final.pdf>.
25. EUCAST Definitive Document E.DEF 2.1, August 2000: Determination of antimicrobial susceptibility test breakpoints. *Clin Microbiol Infect*. 2000; 6(10):570–572. <https://doi.org/10.1046/j.1469-0691.2000.00178.x> PMID: 11168058
26. Schnell D, Lecuyer H, Geeraerts T, Dumenil AS, Bille E, Mercier FJ, et al. Preliminary evaluation of a new clinical algorithm to interpret blood cultures growing coagulase-negative staphylococci. *Scand J Infect Dis*. 2013; 45(7):562–566. <https://doi.org/10.3109/00365548.2013.765590> PMID: 23373849

27. Smith TT, Tamma PD, Do TB, Dzintars KE, Zhao Y, Cosgrove SE, et al. Prolonged linezolid use is associated with the development of linezolid-resistant *Enterococcus faecium*. *Diagn Microbiol Infect Dis*. 2018; 91(2):161–163. <https://doi.org/10.1016/j.diagmicrobio.2018.01.027> PMID: 29496381
28. Scheckler WE, Bobula JA, Beamsley MB, Hadden ST. Bloodstream infections in a community hospital: a 25-year follow-up. *Infect Control Hosp Epidemiol*. 2003; 24(12):936–941. <https://doi.org/10.1086/502162> PMID: 14700409
29. Tarai B, Jain D, Das P, Budhiraja S. Paired blood cultures increase the sensitivity for detecting pathogens in both inpatients and outpatients. *Eur J Clin Microbiol Infect Dis*. 2018; 37(3):435–441. <https://doi.org/10.1007/s10096-018-3188-8> PMID: 29327210
