# Supplementary material for: Antibiotic resistance of blood cultures in regional and tertiary hospital settings of Tyrol, Austria (2006-2015): Impacts & trends
Source: PubMed Central journal article supplement (PMC6786751; doi:10.1371/journal.pone.0223467), 2019-10-10
Supplement: pone.0223467.s001.pdf [file pone.0223467.s001.pdf]

**Table 1: Microorganisms, cumulative incidence/1,000 admitted patients and risk ratio (95% confidence interval) by hospital setting**

| Microorganism category                                           | N cases TH   | % cases TH  | Cumulative incidence           |              |             | Cumulative incidence           |                                |           | RR (TH versus PH) | 95% CI |
|------------------------------------------------------------------|--------------|-------------|--------------------------------|--------------|-------------|--------------------------------|--------------------------------|-----------|-------------------|--------|
|                                                                  |              |             | TH per 1,000 admitted patients | N cases PH   | % cases PH  | PH per 1,000 admitted patients | PH per 1,000 admitted patients |           |                   |        |
| Obligatory pathogens                                             | 4,443        | 47.8%       | 5.3                            | 4,310        | 62.3%       | 3.2                            | 1.68                           | 1.61-1.75 |                   |        |
| Facultative pathogens (without coagulase negative staphylococci) | 581          | 6.3%        | 1.2                            | 337          | 4.9%        | 0.4                            | 2.81                           | 2.46-3.21 |                   |        |
| Coagulase negative staphylococci                                 | 3,808        | 41.0%       | 7.6                            | 2,030        | 29.3%       | 2.3                            | 3.06                           | 2.90-3.23 |                   |        |
| Unusual pathogens                                                | 120          | 1.3%        | 0.2                            | 58           | 0.8%        | 0.1                            | 3.37                           | 2.47-4.61 |                   |        |
| Contamination                                                    | 340          | 3.7%        | 0.7                            | 187          | 2.7%        | 0.2                            | 2.96                           | 2.48-3.54 |                   |        |
| <b>Total</b>                                                     | <b>9,292</b> | <b>100%</b> | <b>18.7</b>                    | <b>6,922</b> | <b>100%</b> | <b>7.7</b>                     | <b>na</b>                      | <b>na</b> |                   |        |

Legend: na=not applicable; TH = tertiary hospital; PH= peripheral hospitals; CI= confidence interval
