# Supplementary material for: Antibiotic resistance of blood cultures in regional and tertiary hospital settings of Tyrol, Austria (2006-2015): Impacts & trends
Source: PubMed Central journal article supplement (PMC6786751; doi:10.1371/journal.pone.0223467), 2019-10-10
Supplement: pone.0223467.s002.pdf [file pone.0223467.s002.pdf]

**Table 2: Number, most commonly isolated pathogens, cumulative incidence/ 1,000 admitted patients by hospital setting**

| Pathogen                            | Total N                | Cumulative                               |                   | Total N                | Cumulative                               |                | P-value                                   |
|-------------------------------------|------------------------|------------------------------------------|-------------------|------------------------|------------------------------------------|----------------|-------------------------------------------|
|                                     | first patient isolates | incidence TH per 1,000 admitted patients | % of pathogens TH | first patient isolates | incidence PH per 1,000 admitted patients | % pathogens PH |                                           |
|                                     | TH                     |                                          | TH                | PH                     |                                          | PH             | difference of % between hospital settings |
| <i>E. coli</i>                      | 1,225                  | 1,5                                      | 27,6%             | 1,644                  | 1,2                                      | 38,1%          | <0.0001                                   |
| <i>Staphylococcus aureus</i>        | 692                    | 0,8                                      | 15,6%             | 747                    | 0,6                                      | 17,3%          | 0.0319                                    |
| <i>Enterococcus sp.</i>             | 596                    | 0,7                                      | 13,4%             | 357                    | 0,3                                      | 8,3%           | <0.0001                                   |
| <i>Klebsiella sp.</i>               | 469                    | 0,6                                      | 10,6%             | 347                    | 0,3                                      | 8,1%           | <0.0001                                   |
| other Gram neg bacteria             | 379                    | 0,5                                      | 8,5%              | 339                    | 0,2                                      | 7,9%           | 0.770                                     |
| <i>Candida sp.</i>                  | 421                    | 0,5                                      | 9,5%              | 229                    | 0,2                                      | 5,3%           | <0.0001                                   |
| <i>Pseudomonas sp.</i>              | 242                    | 0,3                                      | 5,4%              | 151                    | 0,1                                      | 3,5%           | <0.0001                                   |
| <i>Enterobacter sp.</i>             | 223                    | 0,3                                      | 5,0%              | 144                    | 0,1                                      | 3,3%           | <0.0001                                   |
| <i>Streptococcus pneumoniae</i>     | 78                     | 0,1                                      | 1,8%              | 151                    | 0,1                                      | 3,5%           | <0.0001                                   |
| <i>Streptococcus non pneumoniae</i> | 82                     | 0,1                                      | 1,8%              | 133                    | 0,1                                      | 3,1%           | <0.0001                                   |
| Other Gram pos bacteria             | 36                     | 0,0                                      | 0,8%              | 68                     | 0,1                                      | 1,6%           | 0.735                                     |
| TOTAL                               | 4,443                  | 5,3                                      | 100,0%            | 4,310                  | 3,2                                      | 100%           |                                           |

Legend: TH = tertiary hospital; PH= peripheral hospitals
