# Supplementary material for: Antibiotic resistance of blood cultures in regional and tertiary hospital settings of Tyrol, Austria (2006-2015): Impacts & trends
Source: PubMed Central journal article supplement (PMC6786751; doi:10.1371/journal.pone.0223467), 2019-10-10
Supplement: pone.0223467.s003.pdf [file pone.0223467.s003.pdf]

**Table 3: Proportion of resistant strains, cumulative incidence risk ratio (RR) ( 95% confidence interval )**

| Pathogen                     | Antibiotics tested      | % resistant |       | RR (TH versus PH) |            |
|------------------------------|-------------------------|-------------|-------|-------------------|------------|
|                              |                         | TH          | PH    | RR                | 95% CI     |
| <i>E.coli</i>                | Aminopenicillin         | 71.8%       | 61.4% | 1.17              | 1.11-1.23  |
|                              | Ciprofloxacin           | 37.5%       | 22.7% | 1.65              | 1.47-1.85  |
|                              | Ceftriaxone             | 21.3%       | 13.6% | 1.56              | 1.33-1.84  |
|                              | Gentamicin              | 12.1%       | 6.8%  | 1.78              | 1.40-2.24  |
|                              | Carbapenem              | 0.3%        | 0.4%  | 0.77              | 0.23-2.62  |
| <i>Klebsiella sp.</i>        | Ciprofloxacin           | 26.0%       | 17.1% | 1.53              | 1.11-2.11  |
|                              | Ceftriaxone             | 21.0%       | 12.8% | 1.64              | 1.13-2.38  |
|                              | Gentamicin              | 10.5%       | 6.3%  | 3.68              | 2.22-6.10  |
|                              | Carbapenem              | 3.5%        | 1.6%  | 2.26              | 0.74-6.84  |
| <i>Enterococcus faecium</i>  | Vancomycin              | 10.1%       | 2.6%  | 3.91              | 1.21-12.60 |
|                              | Linezolid               | 5.0%        | 0.9%  | 6.12              | 0.82-46.01 |
| <i>Enterococcus faecalis</i> | Vancomycin              | 2.3%        | 0.5%  | 5.07              | 0.63-40.91 |
| <i>Staphylococcus aureus</i> | Cefoxitin*              | 8.5%        | 6.8%  | 1.25              | 0.87-1.79  |
| <i>Pseudomonas sp.</i>       | Ciprofloxacin           | 38.1%       | 15.1% | 2.53              | 1.66-3.84  |
|                              | Ceftazidime             | 26.7%       | 14.2% | 1.88              | 1.97-2.96  |
|                              | Gentamicin              | 26.1%       | 5.4%  | 4.80              | 2.36-9.74  |
|                              | Carbapenem              | 38.9%       | 12.8% | 3.03              | 1.93-4.75  |
|                              | Piperacillin/tazobactam | 19.9%       | 6.8%  | 2.93              | 1.52-5.64  |

Legend: TH = tertiary hospital; PH= peripheral hospitals; \* Cefoxitin as marker for oxacillin/methicillin resistance
